# Supplementary material for: Autism Spectrum Disorder, Developmental and Psychiatric Features in 16p11.2 Duplication
Source: Springer Nature journal article supplement (doi:10.1007/s10803-016-2807-4), 2016-05-21
Supplement: MOESM2 [file 10188656]

**Journal of Autism and Developmental Disorders**

**Autism spectrum disorder, developmental and psychiatric features in 16p11.2 duplication**

LeeAnne Green Snyder1, Debra D’Angelo2, Qixuan Chen2, Raphael Bernier3, Robin P. Goin-Kochel4, Arianne Stevens Wallace3, Jennifer Gerdts3, Stephen Kanne5, Leandra Berry4, Lisa Blaskey6, Emily Kuschner6, Timothy Roberts6, Elliot Sherr7, Christa L. Martin8, David H. Ledbetter8, John E. Spiro1, Wendy K. Chung1,2, Ellen Hanson9, on behalf of the Simons VIP consortium

LeeAnne Green Snyder

Simons Foundation

160 5th Avenue, 7th floor

New York, New York 10010

(860) 501-7793

[lgsnyder@simonsfoundation.org](mailto:lgsnyder@simonsfoundation.org)
